# Supplementary material for: Development and Validation of the COPD Scale among the System of Quality of Life Instruments for Chronic Diseases QLICD-COPD (V2.0)
Source: Research Square preprint supplement (doi:10.21203/rs.3.rs-2033314/v1), 2022-09-09
Supplement: Supplementary file 1 [file f580b82b97ba8d5d85064e1e.docx]

Supplement

Tables

**TABLE 1**

**Demographic characteristics of patients with COPD**

| Item | Category | Number of cases | Proportion (%) | Item | Category | Number of cases | Proportion (%) |
| --- | --- | --- | --- | --- | --- | --- | --- |
| Sex | Male | 243 | 76.7 | Ethnicity | Han | 308 | 97.2 |
| Female | 74 | 23.3 | Others | 9 | 2.8 |
| Education | Primary school | 140 | 44.2 | Occupation | Worker | 77 | 24.3 |
| Junior high school | 113 | 35.6 | Farmer | 123 | 38.8 |
| Senior high school# | 45 | 14.2 | Teacher | 18 | 5.7 |
| College | 12 | 3.8 | Cadre | 53 | 16.7 |
| University or above | 7 | 2.2 | Others | 46 | 14.5 |
| Marital status | Unmarried | 4 | 1.3 | Medical insurance | Self-pay | 29 | 9.1 |
| Married | 265 | 83.6 | Social medical insurance& | 232 | 73.2 |
| Divorced | 3 | 0.9 | Commercial health insurance | 5 | 1.6 |
| Widowed | 45 | 14.2 | Cooperative medical insurance | 51 | 16.1 |
| Economic condition | Poor | 87 | 27.4 | - | - | | |
| Middle-class | 201 | 63.4 |
| Rich | 29 | 9.1 |
| **#**Including technical secondary school | | | | | | | |
| **&** Referring to urban employee medical insurance | | | | | | | |

**TABLE 2**

**Internal consistency and split-half reliability of domains and facets of QLICD-COPD (V2.0)**

| Domain/facet | Cronbach’s alpha | Split-half reliability |
| --- | --- | --- |
| Physiological domain | 0.719 | 0.524 |
| Basic physiological functioning | 0.605 | 0.53 |
| Independence | 0.84 | 0.793 |
| Energy | 0.562 | 0.562 |
| Psychological domain | 0.817 | 0.840 |
| Cognition | 0.405 | 0.405 |
| Emotion | 0.787 | 0.774 |
| Will and personality | 0.352 | 0.352 |
| Social domain | 0.685 | 0.682 |
| Interpersonal communication | 0.513 | 0.600 |
| Social support and security | 0.456 | 0.302 |
| Social role | 0.226 | 0.226 |
| Core/general domain | 0.875 | 0.778 |
| Specific domain | 0.669 | 0.627 |
| Cough and sputum production | 0.585 | 0.467 |
| Shortness of breath | 0.665 | 0.574 |
| Total scale | 0.889 | 0.864 |

**TABLE 3**

**Inter- and intra-domain correlation and Cronbach’s alpha coefficients**

| Domain | Domain | | | |
| --- | --- | --- | --- | --- |
| Physiological domain | Psychological domain | Social  domain | Specific  domain |
| Physiological domain | 0.719* | 0.494 | 0.467 | 0.522 |
| Psychological domain | 0.494 | 0.817* | 0.650 | 0.555 |
| Social domain | 0.467 | 0.650 | 0.685* | 0.388 |
| Specific domain | 0.522 | 0.555 | 0.388 | 0.669* |
| *Internal consistency | | | | |

**TABLE 4**

**Item-domain correlations of QLICD-COPD (V2.0)**

| Item | Domain | | | |
| --- | --- | --- | --- | --- |
| Physiological domain | Psychological domain | Social  domain | Specific  domain |
| GPH1 | **0.599** | 0.229 | 0.225 | 0.237 |
| GPH2 | **0.521** | 0.275 | 0.247 | 0.332 |
| GPH3 | **0.368** | 0.153 | 0.214 | 0.136 |
| GPH4 | **0.437** | 0.148 | 0.063 | 0.171 |
| GPH5 | **0.456** | 0.390 | 0.309 | 0.420 |
| GPH6 | **0.671** | 0.269 | 0.309 | 0.294 |
| GPH7 | **0.628** | 0.280 | 0.287 | 0.296 |
| GPH8 | **0.691** | 0.325 | 0.337 | 0.274 |
| GPH9 | **0.589** | 0.344 | 0.295 | 0.390 |
| GPS1 | 0.430 | **0.528** | 0.444 | 0.291 |
| GPS2 | 0.328 | **0.390** | 0.269 | 0.269 |
| GPS3 | 0.337 | **0.540** | 0.388 | 0.258 |
| GPS4 | 0.293 | **0.474** | 0.248 | 0.321 |
| GPS5 | 0.246 | **0.632** | 0.454 | 0.334 |
| GPS6 | 0.193 | **0.642** | 0.369 | 0.377 |
| GPS7 | 0.360 | **0.772** | 0.467 | 0.423 |
| GPS8 | 0.318 | **0.703** | 0.489 | 0.335 |
| GPS9 | 0.209 | **0.660** | 0.350 | 0.380 |
| GPS10 | 0.414 | **0.634** | 0.546 | 0.281 |
| GPS11 | 0.212 | **0.568** | 0.260 | 0.353 |
| GSO1 | 0.410 | 0.361 | **0.520** | 0.231 |
| GSO2 | 0.126 | 0.326 | **0.640** | 0.179 |
| GSO3 | 0.095 | 0.288 | **0.622** | 0.144 |
| GSO4 | 0.170 | 0.274 | **0.565** | 0.113 |
| GSO5 | 0.261 | 0.295 | **0.645** | 0.196 |
| GSO6 | 0.274 | 0.547 | **0.560** | 0.327 |
| GSO7 | 0.364 | 0.404 | **0.534** | 0.318 |
| GSO8 | 0.303 | 0.351 | **0.514** | 0.158 |
| COPD1 | 0.120 | 0.185 | 0.135 | **0.424** |
| COPD2 | 0.229 | 0.178 | 0.113 | **0.446** |
| COPD3 | 0.138 | 0.253 | 0.150 | **0.574** |
| COPD4 | 0.151 | 0.302 | 0.204 | **0.583** |
| COPD5 | 0.417 | 0.335 | 0.315 | **0.615** |
| COPD6 | 0.273 | 0.309 | 0.150 | **0.505** |
| COPD7 | 0.448 | 0.356 | 0.264 | **0.562** |
| COPD8 | 0.309 | 0.307 | 0.236 | **0.520** |
| COPD9 | 0.351 | 0.378 | 0.241 | **0.470** |

**TABLE 5**

**Principal components of the specific module and orthogonal rotated factor loadings using the equamax method**

| Item | Principal component (contribution to variance, %) | | | |
| --- | --- | --- | --- | --- |
| 1 (27.77) | 2 (18.35) | 3 (11.79) | 4 (9.45) |
| COPD1 | -0.118 | 0.384 | 0.129 | **0.541** |
| COPD2 | -0.043 | 0.065 | **0.825** | 0.116 |
| COPD3 | 0.077 | **0.875** | 0.108 | 0.059 |
| COPD4 | 0.087 | **0.856** | -0.010 | 0.236 |
| COPD5 | **0.763** | 0.043 | 0.315 | 0.006 |
| COPD6 | **0.807** | 0.102 | -0.155 | 0.123 |
| COPD7 | **0.635** | 0.033 | 0.361 | 0.003 |
| COPD8 | 0.355 | 0.054 | **0.615** | -0.018 |
| COPD9 | 0.159 | 0.041 | 0.001 | **0.895** |

**TABLE 6**

**Correlation coefficients between domains of SF-36 and domains of QLICD-COPD (V2.0)**

| SF-36 | QLICD-COPD (V2.0) | | | |
| --- | --- | --- | --- | --- |
| Physiological domain | Psychological domain | Social  domain | Specific  domain |
| Physical functioning | 0.453 | 0.288 | 0.245 | 0.245 |
| Physical role functioning | 0.192 | 0.292 | 0.121 | 0.192 |
| Bodily pain | 0.442 | 0.450 | 0.317 | 0.297 |
| General health | 0.325 | 0.466 | 0.349 | 0.309 |
| Vitality | 0.472 | 0.470 | 0.353 | 0.288 |
| Social role functioning | 0.540 | 0.354 | 0.369 | 0.143 |
| Emotional role functioning | 0.170 | 0.477 | 0.321 | 0.261 |
| Mental health | 0.358 | 0.612 | 0.487 | 0.214 |

**TABLE 7**

**Comparison of scores of domains and facets in patients with COPD at admission and discharge**

| Domain/facet | At admission | | At discharge | | Difference | | | Paired *t*-test | |
| --- | --- | --- | --- | --- | --- | --- | --- | --- | --- |
| Mean | SD**#** | Mean | SD**#** | Mean | SD**#** | SRM**&** | *t* | *P* |
| Physiological domain | 48.86 | 13.16 | 56.14 | 12.31 | 7.29 | 8.14 | 0.90 | -15.92 | **0.000** |
| Basic physiological functioning | 48.00 | 13.98 | 55.95 | 12.08 | 7.95 | 10.82 | 0.73 | -13.06 | 0.000 |
| Independence | 52.61 | 22.21 | 55.51 | 22.04 | 2.90 | 9.69 | 0.30 | -5.32 | 0.000 |
| Energy | 44.94 | 22.07 | 57.48 | 17.34 | 12.54 | 17.83 | 0.70 | -12.50 | 0.000 |
| Psychological domain | 59.39 | 13.95 | 61.46 | 13.26 | 2.06 | 6.61 | 0.31 | -5.55 | **0.000** |
| Cognition | 56.33 | 16.83 | 60.17 | 16.34 | 3.84 | 13.35 | 0.29 | -5.11 | 0.000 |
| Emotion | 59.15 | 16.24 | 60.86 | 15.19 | 1.71 | 7.80 | 0.22 | -3.89 | 0.000 |
| Will and personality | 63.29 | 17.00 | 64.83 | 17.14 | 1.54 | 12.56 | 0.12 | -2.18 | 0.030 |
| Social domain | 68.58 | 12.58 | 67.89 | 13.06 | -0.69 | 6.69 | 0.10 | 1.84 | **0.067** |
| Interpersonal communication | 75.58 | 13.74 | 75.92 | 14.28 | 0.34 | 8.99 | 0.04 | -0.68 | 0.498 |
| Social support and security | 72.23 | 16.49 | 70.75 | 16.62 | -1.48 | 9.18 | 0.16 | 2.86 | 0.005 |
| Social role | 52.61 | 18.69 | 51.54 | 19.32 | -1.07 | 14.03 | -0.08 | 1.35 | 0.177 |
| Core/general domain | 58.63 | 11.12 | 61.59 | 10.89 | 2.96 | 5.03 | 0.59 | -10.44 | **0.000** |
| Specific domain | 50.82 | 13.09 | 64.92 | 11.70 | 14.10 | 11.53 | 1.22 | -21.74 | **0.000** |
| Cough and sputum production | 47.39 | 16.47 | 67.64 | 14.95 | 20.25 | 15.98 | 1.27 | -22.53 | 0.000 |
| Shortness of breath | 48.97 | 19.58 | 61.47 | 15.81 | 12.50 | 15.25 | 0.82 | -14.57 | 0.000 |
| Pulmonary encephalopathy | 69.30 | 25.65 | 73.34 | 21.80 | 4.03 | 20.93 | 0.19 | -3.43 | 0.001 |
| Implications of specific psychological features for the patient’s life | 51.58 | 24.75 | 55.93 | 24.04 | 4.35 | 17.56 | 0.25 | -4.40 | 0.000 |
| **Total scale** | 56.73 | 10.63 | 62.40 | 10.08 | 5.67 | 5.63 | 1.01 | -17.88 | **0.00** |
| **#** Standard deviation | | | | | | | | | |
| **&**Standardized response mean | | | | | | | | | |
